# Supplementary material for: Wild Bilberry (Vaccinium myrtillus L., Ericaceae) from Montenegro as a Source of Antioxidants for Use in the Production of Nutraceuticals
Source: PubMed Central journal article supplement (PMC6222815; doi:10.3390/molecules23081864), 2018-07-26
Supplement: molecules-23-01864-s001.pdf [file molecules-23-01864-s001.pdf]

## Supplementary Materials

# Wild bilberry (*Vaccinium myrtillus* L., Ericaceae) from Montenegro as a Source of Antioxidants for Use in the Production of Nutraceuticals

Snezana Brasanac-Vukanovic<sup>1</sup>, Jelena Mutic<sup>2</sup>, Dalibor M. Stankovic<sup>2,3</sup>, Ivana Arsic<sup>4</sup>, Nada Blagojevic<sup>1</sup>, Vesna Vukasinovic-Pesic<sup>1</sup> and Vanja M. Tadic<sup>5,\*</sup>

<sup>1</sup> Faculty of Metallurgy and Technology, University of Montenegro, Džordža Vasiingtona bb, 20000 Podgorica, Montenegro; e-mails: [sneza\\_b@yahoo.com](mailto:sneza_b@yahoo.com); [nadab@ac.me](mailto:nadab@ac.me); [vesnav@ac.me](mailto:vesnav@ac.me)

<sup>2</sup> Faculty of Chemistry, University of Belgrade, Studentski trg 12-16, 11001, Belgrade, Serbia; e-mail: [jmutic@chem.bg.ac.rs](mailto:jmutic@chem.bg.ac.rs)

<sup>3</sup> The Vinča Institute of Nuclear Sciences, University of Belgrade, POB 522, 11001 Belgrade, Serbia; e-mail: [dalibors@chem.bg.ac.rs](mailto:dalibors@chem.bg.ac.rs)

<sup>4</sup> University of Nis, Faculty of Medicine, Department of Pharmacy, 18000 Nis, Serbia; e-mail: [ivanafarmacija@gmail.com](mailto:ivanafarmacija@gmail.com)

<sup>5</sup> Institute for Medicinal Plant Research "Dr Josif Pancic", Tadeusa Koscuska 1, 11000, Belgrade, Serbia; e-mail: [vtadic@mocbilja.rs](mailto:vtadic@mocbilja.rs)

\* e-mail: [vtadic@mocbilja.rs](mailto:vtadic@mocbilja.rs); Tel.: +381 11 3031 658; +381 64 3130 918; Fax: +381 11 3031 655

## Contents

**Table S1.** Content of phenolic compounds determined by HPLC in the investigated extracts

**Figure S1.** Identified compounds in the investigated extracts: **(a)** derivatives of hydroxybenzoic acid; **(b)** derivatives of hydroxycinnamic acid; **(c)** flavons and flavonols; **(d)** flavanols; **(e)** pyrogallol; **(f)** resveratrol (stilbene)

**Table S2a.** The metal content in the investigated extracts

**Table S2b.** The daily mineral intake of essential and toxic elements [%] calculated in 1g of the investigated extracts according to recommendation\*

**Figure S2.** Principal component loading plot of **(a)** leaves; and **(b)** fruits extracts. Total phenolic compounds (TP), total tannins (TT), total flavonoids (TF), total procyanidins, total anthocyanins, essential metals content, toxic metals content, radical scavenging activity-IC<sub>50</sub> (DPPH), ferric reducing antioxidant power (FRAP)

**Table S3.** Correlation between TT, TF, proanthocyanidins, anthocyanins and TP and antioxidant activity; correlation between the applied tests DPPH and FRAP in the leaves and fruits extracts

**Table S4.** Correlation between identified individual phenolic compounds and antioxidant activity in the leaves and fruits extracts

**Table S5.** Correlation between all the identified metals and antioxidant activity in the leaves and fruits extracts

**Table S6.** Correlation between the group of essential and toxic metals and antioxidant activity in the leaves and fruits extracts

**Table S1.** Content of phenolic compounds determined by HPLC in the investigated extracts [mg/g].

| Phenolic compounds          |    | MFEI | MFEM | MFES | MLEI  | MLEM  | MLES  |
|-----------------------------|----|------|------|------|-------|-------|-------|
| Gallic acid                 | 1  | 0.73 | 1.03 | 0.78 | 0.58  | 0.80  | 0.54  |
| Pyrogallol                  | 2  | -    | -    | -    | 3.16  | 2.45  | 3.46  |
| Neochlorogenic acid         | 3  | 0.01 | 0.41 | -    | 1.86  | 0.34  | 3.72  |
| Protocatechuic acid         | 4  | 1.10 | 1.42 | 1.23 | 1.74  | 1.40  | 1.73  |
| Chlorogenic acid            | 5  | 1.82 | 2.48 | 1.95 | 59.70 | 45.51 | 55.28 |
| Procyanidin B2              | 6  | 0.11 | 0.13 | 0.14 | 0.89  | 1.03  | 0.31  |
| Caffeic acid                | 7  | 0.16 | 0.31 | 0.32 | 1.25  | 1.95  | 1.90  |
| Epicatechin                 | 8  | -    | -    | -    | 4.38  | 5.16  | 5.75  |
| p-coumric acid              | 9  | 0.21 | 0.34 | 0.24 | 1.53  | 1.26  | 2.08  |
| Sinapic acid                | 10 | 0.03 | 0.06 | 0.03 | 0.39  | 0.18  | 0.63  |
| Ferulic acid                | 11 | 0.05 | 0.07 | 0.01 | 0.11  | 0.26  | 0.28  |
| Stilbenoid derivative 1     | 12 | *    | *    | *    | *     | *     | *     |
| Rutin                       | 13 | -    | -    | -    |       | 4.73  | 4.94  |
| Hyperoside                  | 14 | 0.17 | 0.34 | 0.26 | 2.55  | 2.51  | 2.38  |
| Isoquercetin                | 15 | 0.30 | 0.30 | 0.31 | 16.20 | 14.62 | 9.92  |
| Stilbenoid derivative 2     | 16 | *    | *    | *    | *     | *     | *     |
| Stilbenoid derivative 3     | 17 | *    | -    | *    | *     | *     | *     |
| Kaempferol-3-O-glukoside    | 18 | 0.05 | 0.15 | 0.06 | 1.60  | 1.56  | 1.38  |
| Quercetin derivative 1      | 19 | *    | -    | *    | *     | *     | *     |
| Quercetin derivative 2      | 20 | *    | -    | *    | -     | -     | -     |
| Resveratrol                 | 21 | 0.01 | 0.07 | 0.03 | 4.69  | 4.60  | 5.15  |
| Chlorogenic acid derivative | 22 | -    | -    | -    | -     | *     | -     |
| Quercetin                   | 23 | 0.07 | 0.40 | 0.46 | 1.16  | 2.11  | 7.27  |
| Kaempferol                  | 24 | -    | -    | -    | 0.03  | 0.10  | 0.26  |

\* tentative identification

(a)

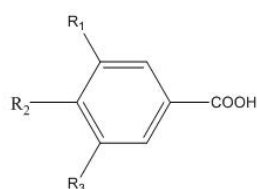

| Derivatives of hydroxybenzoic acid | R <sub>1</sub> | R <sub>2</sub> | R <sub>3</sub> |
|------------------------------------|----------------|----------------|----------------|
| Gallic acid                        | OH             | OH             | OH             |
| Protocatechuic acid                | H              | OH             | OH             |

(b)

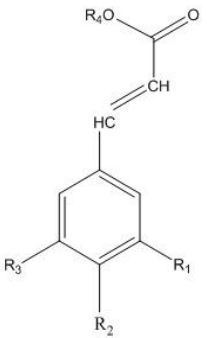

| Derivatives of hydroxycinnamic acid            | R <sub>1</sub>   | R <sub>2</sub> | R <sub>3</sub>   | R <sub>4</sub>                                                                                     |
|------------------------------------------------|------------------|----------------|------------------|----------------------------------------------------------------------------------------------------|
| Neochlorogenic acid<br>(5-caffeoylquinic acid) | OH               | OH             | H                | Quinic acid<br> |
| Chlorogenic acid<br>(3-caffeoylquinic acid)    | OH               | OH             | H                | Quinic acid<br> |
| Caffeic acid                                   | OH               | OH             | H                | H                                                                                                  |
| <i>p</i> -Coumaric acid                        | H                | OH             | H                | H                                                                                                  |
| Sinapic acid                                   | OCH <sub>3</sub> | OH             | OCH <sub>3</sub> | H                                                                                                  |
| Ferulic acid                                   | OCH <sub>3</sub> | OH             | H                | H                                                                                                  |

(c)

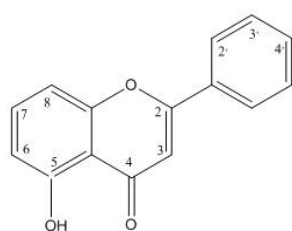

| Flavones and flavonols            | C <sub>2</sub>           | C <sub>3</sub> | C <sub>4</sub> | C <sub>7</sub> | C <sub>8</sub> |
|-----------------------------------|--------------------------|----------------|----------------|----------------|----------------|
| Rutin                             | <i>O</i> -β-D-rutinosyl  | OH             | OH             | OH             | H              |
| Hyperoside                        | <i>O</i> -β-D-galactosyl | OH             | OH             | OH             | H              |
| Isoquercetin                      | <i>O</i> -β-D-glucosyl   | OH             | OH             | OH             | H              |
| Kaempferol-3- <i>O</i> -glukoside | <i>O</i> -β-D-glucosyl   | H              | OH             | OH             | H              |
| Quercetin                         | OH                       | OH             | OH             | OH             | H              |
| Kaempferol                        | OH                       | H              | OH             | OH             | H              |

(d)

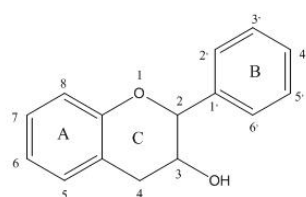

| Flavanols         | C <sub>5</sub> | C <sub>4</sub>                                                                      | C <sub>7</sub> | C <sub>4'</sub> | C <sub>5'</sub> |
|-------------------|----------------|-------------------------------------------------------------------------------------|----------------|-----------------|-----------------|
| procyanidin<br>B2 | OH             | 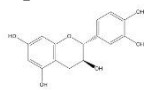 | OH             | OH              | OH              |
| epicatechin       | OH             | H                                                                                   | OH             | OH              | OH              |

(e) Pyrogallol

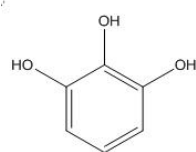

(f) Resveratrol (stilbene)

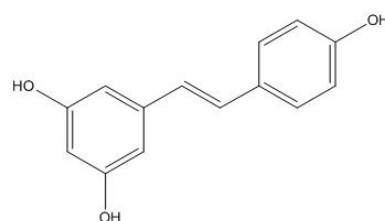

**Figure S1.** Identified compounds in the investigated extracts: (a) derivatives of hydroxybenzoic acid; (b) derivatives of hydroxycinnamic acid; (c) flavons and flavonols; (d) flavanols; (e) pyrogallol; (f) resveratrol (stilbene).

**Table S2a.** The metal content in the investigated extracts.

|           | MFES          | MFEM        | MFEI        | MLES        | MLEM         | MLEI        |
|-----------|---------------|-------------|-------------|-------------|--------------|-------------|
| Al (µg/g) | 14.2±0.7      | 8.92±0.04   | 40.30±0.06  | 7.45±0.06   | 17.8±0.2     | 186.2±0.2   |
| As (µg/g) | -             | -           | 0.039±0.002 | 0.059±0.002 | 0.297±0.004  | -           |
| Ba (µg/g) | 2.626±0.008   | 1.101±0.006 | 11.43±0.02  | 5.36±0.03   | 6.283±0.009  | 69.6±0.8    |
| Cd (µg/g) | 0.0249±0.0002 | 0.026±0.002 | 0.030±0.002 | 0.047±0.002 | 0.016±0.001  | 0.112±0.007 |
| Co (µg/g) | -             | 0.072±0.002 | -           | -           | 0.055±0.001  | -           |
| Cr (µg/g) | 0.181±0.004   | 0.22±0.03   | 0.305±0.008 | 0.463±0.009 | 0.123±0.002  | 1.11±0.03   |
| Cu (µg/g) | 3.62±0.03     | 3.32±0.05   | 1.513±0.010 | 33.31±0.09  | 19.53±0.04   | 2.99±0.04   |
| Mn (µg/g) | 42.85±0.10    | 43.67±0.06  | 150.3±0.7   | 472±4       | 1210±2       | 251.4±11    |
| Ni (µg/g) | 0.96±0.02     | 0.94±0.02   | 1.469±0.008 | 2.184±0.005 | 4.398±0.006  | 2.85±0.02   |
| Pb (µg/g) | 0.104±0.002   | 0.486±0.007 | 0.096±0.004 | 0.63±0.02   | 0.60±0.05    | 0.47±0.02   |
| Sr (µg/g) | 0.582±0.003   | 0.738±0.007 | 3.675±0.008 | 5.96±0.02   | 11.775±0.009 | 14.67±0.08  |
| Zn (µg/g) | 8.99±0.02     | 6.281±0.007 | 17.35±0.05  | 29.55±0.09  | 20.49±0.04   | 31.48±0.04  |
| Na (µg/g) | 107±1         | 33.6±0.3    | 951±15      | 1262±7      | 1128±20      | 138±2       |
| Fe (µg/g) | 11.9±0.2      | 5.90±0.05   | 37.6±0.2    | 17.37±0.04  | 25.75±0.09   | 19.8±0.2    |
| K (mg/g)  | 6.60±0.08     | 6.01±0.10   | 10.66±0.10  | 8.19±0.02   | 9.24±0.02    | 17.22±0.02  |
| Mg (mg/g) | 0.442±0.009   | 0.397±0.007 | 1.024±0.003 | 1.546±0.009 | 2.66±0.02    | 3.83±0.02   |
| Ca (mg/g) | 0.425±0.001   | 0.383±0.005 | 1.321±0.010 | 1.233±0.004 | 2.97±0.03    | 5.94±0.02   |

\*Detection limit of the instrument for Co and As was 0.002 µg/g; 0.005 µg/g, respectively

**Table S2b.** The daily mineral intake of essential and toxic elements [%] calculated in 1g of the investigated extracts according to recommendation\*.

|       | MDI**<br>(µg per day) and<br>RDA*** (mg per<br>day) | MFES | MFEM | MFEI | MLES  | MLEM  | MLEI  |
|-------|-----------------------------------------------------|------|------|------|-------|-------|-------|
|       |                                                     | Cr   | 0.04 | 0.45 | 0.55  | 0.76  | 1.16  |
| K     | 2000                                                | 0.33 | 0.30 | 0.53 | 0.41  | 0.46  | 0.86  |
| Mg    | 375                                                 | 0.11 | 0.12 | 0.27 | 0.41  | 0.71  | 1.02  |
| Ca    | 800                                                 | 0.05 | 0.05 | 0.17 | 0.15  | 0.37  | 0.74  |
| Cu    | 1                                                   | 0.36 | 0.33 | 0.15 | 3.33  | 1.95  | 0.30  |
| Mn    | 2                                                   | 2.14 | 2.18 | 7.52 | 23.60 | 60.50 | 12.57 |
| Zn    | 10                                                  | 0.09 | 0.06 | 0.17 | 0.30  | 0.20  | 0.31  |
| Fe    | 14                                                  | 0.09 | 0.04 | 0.27 | 0.12  | 1.84  | 0.14  |
| Pb*** | 250                                                 | 0.04 | 0.19 | 0.04 | 0.25  | 0.24  | 0.19  |
| As*** | 150                                                 | -    | -    | 0.03 | 0.04  | 0.20  | -     |
| Cd*** | 25                                                  | 0.10 | 0.10 | 0.12 | 0.19  | 0.06  | 0.45  |

\* The used literature [1-4];

[1-4] \*\*MDI-Maximum daily intake for essential elements; \*\*\*RDA- recommended daily allowance for toxic elements

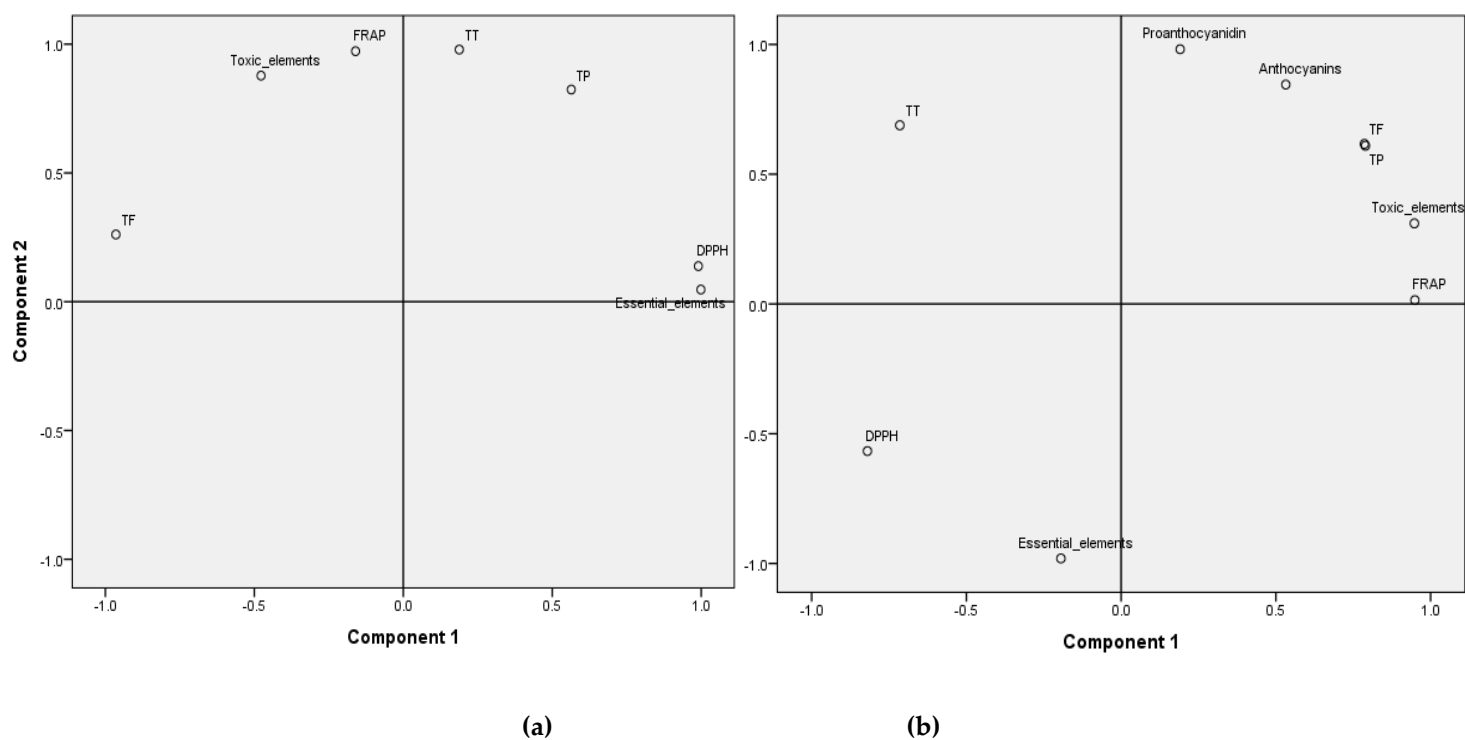

**Figure S2.** Principal component loading plot of (a) leaves; and (b) fruits extracts. Total phenolic compounds (TP), total tannins (TT), total flavonoids (TF), total procyanidins, total anthocyanins, essential metals content, toxic metals content, radical scavenging activity-IC<sub>50</sub> (DPPH), ferric reducing antioxidant power (FRAP).

**Table S3.** Correlation between TT, TF, proanthocyanidins, anthocyanins and TP and antioxidant activity; correlation between the applied tests DPPH and FRAP in the leaves and fruits extracts.

|                   | Fruits                 |                        | Leaves                 |                        |
|-------------------|------------------------|------------------------|------------------------|------------------------|
|                   | DPPH (R <sup>2</sup> ) | FRAP (R <sup>2</sup> ) | DPPH (R <sup>2</sup> ) | FRAP (R <sup>2</sup> ) |
| TT                | 0.0434                 | 0.4898                 | 0.104                  | 0.882                  |
| TF                | 0.996                  | 0.6517                 | 0.8446                 | 0.1719                 |
| TP                | 0.9972                 | 0.6617                 | 0.4529                 | 0.5249                 |
| Proanthocyanidins | 0.5059                 | 0.0491                 |                        |                        |
| Anthocyanins      | 0.8381                 | 0.3085                 |                        |                        |
| DPPH              |                        | 0.710                  |                        | 0.0006                 |

**Table S4.** Correlation between identified individual phenolic compounds and antioxidant activity in the leaves and fruits extracts.

| Phenolic compounds       | Fruits                                         |                                     | Leaves                              |                                      |
|--------------------------|------------------------------------------------|-------------------------------------|-------------------------------------|--------------------------------------|
|                          | DPPH                                           | FRAP                                | DPPH                                | FRAP                                 |
| Gallic acid              | $y=-0.0005x+0.1294$<br>$R^2=0.9947$            | $y=24.839x+0.0641$<br>$R^2=0.7743$  | $y=0.0008x+0.0567$<br>$R^2=0.0696$  | $y=13.131x+0.0389$<br>$R^2=0.9178$   |
| Pyrogallol               | -                                              | -                                   | $y=-0.0047x+0.3386$<br>$R^2=0.1721$ | $y=-45.575x+0.3856$<br>$R^2=0.8095$  |
| Neochlorogenic acid      | $y=-0.0008x+0.0808$<br>$R^2=0.9528$            | $y=39.847x-0.0178$<br>$R^2=0.8833$  | $y=-0.2414x+3.8452$<br>$R^2=0.4201$ | $y=-109.41x+40.3745$<br>$R^2=0.6885$ |
| Protocatechuic acid      | $y=-0.0006x+0.1713$<br>$R^2=0.9652$            | $y=21.234x+0.1081$<br>$R^2=0.5299$  | $y=-0.0042x+1.6555$<br>$R^2=0.0095$ | $y=-188.02x+1.968$<br>$R^2=0.9853$   |
| Chlorogenic acid         | $y=-0.0012x+0.3084$<br>$R^2=1$                 | $y=52.581x+0.1656$<br>$R^2=0.7087$  | $y=0.0294x+5.1214$<br>$R^2=0.0339$  | $y=-701.23x+6.6349$<br>$R^2=0.9742$  |
| Procyanidin B2           | $y=-0.0002x+0.1435$<br>$R^2=0.1449$            | $y=-4.8387x+0.1305$<br>$R^2=0.0311$ | $y=0.0701x+0.2002$<br>$R^2=0.6956$  | $y=198.72x+0.379$<br>$R^2=0.2827$    |
| Caffeic acid             | $y=-0.0002x+0.0404$<br>$R^2=0.3273$            | $y=0.6452x+0.0255$<br>$R^2=0.0017$  | $y=-0.0066x+0.2209$<br>$R^2=0.5748$ | $y=25.99x+0.122$<br>$R^2=0.4488$     |
| Epicatechin              | -                                              | -                                   | $y=-0.0149x+0.6249$<br>$R^2=0.9578$ | $y=15.511x+0.4809$<br>$R^2=0.0524$   |
| <i>p</i> -Coumaric acid  | $y=-0.0002x+0.0441$<br>$R^2=0.9982$            | $y=9.1935x+0.0186$<br>$R^2=0.6718$  | $y=-0.0068x+0.2147$<br>$R^2=0.5654$ | $y=-25.958x+0.2093$<br>$R^2=0.4111$  |
| Ferulic acid             | $y=-5 \times 10^{-5} x+0.0078$<br>$R^2=0.2412$ | $y=4.1935x+0.0006$<br>$R^2=0.7788$  | $y=-0.0018x+0.0343$<br>$R^2=0.7363$ | $y=4.8562x+0.0118$<br>$R^2=0.285$    |
| Sinapic acid             | $y=-5 \times 10^{-5} x+0.0077$<br>$R^2=0.9824$ | $y=2.0968x+0.0017$<br>$R^2=0.5841$  | $y=-0.0033x+0.0646$<br>$R^2=0.4124$ | $y=-16.933x+0.0704$<br>$R^2=0.5641$  |
| Rutin                    | -                                              | -                                   | $y=0.0035x+0.4714$<br>$R^2=0.2866$  | $y=-25.096x+0.5447$<br>$R^2=0.7347$  |
| Hyperoside               | $y=-0.0003x+0.0487$<br>$R^2=0.8778$            | $y=9.1935x+0.0183$<br>$R^2=0.3622$  | $y=0.0018x+0.2335$<br>$R^2=0.9512$  | $y=1.6454x+0.2447$<br>$R^2=0.039$    |
| Isoquercetin             | $y=8 \times 10^{-6} x+0.0295$<br>$R^2=0.4391$  | $y=-0.6016x+0.0307$<br>$R^2=0.9243$ | $y=0.071x+0.8067$<br>$R^2=0.9754$   | $y=42.636x+1.2792$<br>$R^2=0.0178$   |
| Kaempferol-3-O-glucoside | $y=-0.0002x+0.0255$<br>$R^2=0.9861$            | $y=9.8387x+0.0001$<br>$R^2=0.811$   | $y=0.0025x+0.1319$<br>$R^2=0.9487$  | $y=2.3323x+0.1471$<br>$R^2=0.0413$   |
| Resveratrol              | $y=-0.0001x+0.0126$<br>$R^2=0.998$             | $y=5x-0.0007$<br>$R^2=0.75$         | $y=-0.0056x+0.5244$<br>$R^2=0.7266$ | $y=-14.792x+0.5078$<br>$R^2=0.2524$  |
| Quercetin                | $y=-0.0004x+0.0634$<br>$R^2=0.3009$            | $y=0.4839x+0.0296$<br>$R^2=0.0002$  | $y=-0.07x+0.8939$<br>$R^2=0.9355$   | $y=-74.329x+0.4873$<br>$R^2=0.0533$  |
| Kaempferol               | -                                              | -                                   | $y=-0.0026x+0.032$<br>$R^2=0.9903$  | $y=-0.8626x+0.0136$<br>$R^2=0.0056$  |

**Table S5.** Correlation between all the identified metals and antioxidant activity in the leaves and fruits extracts.

|                  | Leaves                                      | Leaves                                      | Fruits                                                  | Fruits                                      |
|------------------|---------------------------------------------|---------------------------------------------|---------------------------------------------------------|---------------------------------------------|
|                  | IC <sub>50</sub> (µg/mL)                    | Fe <sup>2+</sup> (mmol/g)                   | IC <sub>50</sub> (µg/mL)                                | Fe <sup>2+</sup> (mmol/g)                   |
| <b>Al (µg/g)</b> | y=18.279x-71.24<br>R <sup>2</sup> =0.6853   | y=-57033x+175.04<br>R <sup>2</sup> =0.337   | y=0.4501x-16.41<br>R <sup>2</sup> =0.5958               | y=-9319.4x+28.595<br>R <sup>2</sup> =0.0954 |
| <b>As (µg/g)</b> | y=0.0023x+0.1361<br>R <sup>2</sup> =0.0042  | y=153.8x-0.1633<br>R <sup>2</sup> =0.9983   | y=0.0005x-0.0302<br>R <sup>2</sup> =0.4387              | y=-6.2903x+0.018<br>R <sup>2</sup> =0.0242  |
| <b>Ba (µg/g)</b> | y=6.5254x-23.513<br>R <sup>2</sup> =0.6485  | y=22060x+67.525<br>R <sup>2</sup> =0.3744   | y=0.1468x-7.1945<br>R <sup>2</sup> =0.5755              | y=-2895.8x+7.369<br>R <sup>2</sup> =0.0836  |
| <b>Cd (µg/g)</b> | y=0.0061x+0.011<br>R <sup>2</sup> =0.3205   | y=-40.176x+0.132<br>R <sup>2</sup> =0.7016  | y=5x10 <sup>-5</sup> x+0.0231<br>R <sup>2</sup> =0.2448 | y=0.2419x+0.0268<br>R <sup>2</sup> =0.0025  |
| <b>Co (µg/g)</b> | y=0.0009x+0.0117<br>R <sup>2</sup> =0.0152  | y=30.751x-0.038<br>R <sup>2</sup> =0.9784   | y=-0.0014x+0.142<br>R <sup>2</sup> =0.9604              | y=69.677x-0.0317<br>R <sup>2</sup> =0.871   |
| <b>Cr (µg/g)</b> | y=0.0603x+0.0982<br>R <sup>2</sup> =0.2983  | y=-417.48x+1.3307<br>R <sup>2</sup> =0.7233 | y=0.0009x+0.1619<br>R <sup>2</sup> =0.1599              | y=-3.5004x+0.2412<br>R <sup>2</sup> =0.0126 |
| <b>Cu (µg/g)</b> | y=-3.2888x+44.109<br>R <sup>2</sup> =0.9693 | y=2951.1x+13.2<br>R <sup>2</sup> =0.0394    | y=-0.0221x+4.6593<br>R <sup>2</sup> =0.3114             | y=162.1x+2.5475<br>R <sup>2</sup> =0.0834   |
| <b>Mn (µg/g)</b> | y=218.52x-295.57<br>R <sup>2</sup> =0.9224  | y=-305016x+1957.9<br>R <sup>2</sup> =0.0908 | y=1.4101x+38.695<br>R <sup>2</sup> =0.4322              | y=-16537x+92.17<br>R <sup>2</sup> =0.0222   |
| <b>Ni (µg/g)</b> | y=0.1022x+2.3519<br>R <sup>2</sup> =0.1671  | y=1003.8x+1.3037<br>R <sup>2</sup> =0.8148  | y=0.0071x+0.5266<br>R <sup>2</sup> =0.472               | y=-101.45x+1.2042<br>R <sup>2</sup> =0.0355 |
| <b>Pb (µg/g)</b> | y=-0.0167x+0.696<br>R <sup>2</sup> =0.795   | y=39.457x+0.4943<br>R <sup>2</sup> =0.2246  | y=-0.0076x+0.8633<br>R <sup>2</sup> =0.9671             | y=370.97x-0.0681<br>R <sup>2</sup> =0.8587  |
| <b>Sr (µg/g)</b> | y=0.9738x+3.2513<br>R <sup>2</sup> =0.9954  | y=190.18x+10.453<br>R <sup>2</sup> =0.0019  | y=0.038x-1.5043<br>R <sup>2</sup> =0.3946               | y=-347.9x+1.9433<br>R <sup>2</sup> =0.0124  |
| <b>Zn (µg/g)</b> | y=0.0538x+26.756<br>R <sup>2</sup> =0.0017  | y=-5743.8x+37.704<br>R <sup>2</sup> =0.9997 | y=0.1642x-2.8232<br>R <sup>2</sup> =0.672               | y=-1746.7x+13.785<br>R <sup>2</sup> =0.3778 |
| <b>Na (µg/g)</b> | y=-116.02x+1742.2<br>R <sup>2</sup> =0.7376 | y=320096x+255.82<br>R <sup>2</sup> =0.2836  | y=12.642x-690.74<br>R <sup>2</sup> =0.5106              | y=-207069x+529.55<br>R <sup>2</sup> =0.0512 |
| <b>Fe (µg/g)</b> | y=0.3775x+18.047<br>R <sup>2</sup> =0.1583  | y=3831.3x+13.949<br>R <sup>2</sup> =0.8239  | y=0.4589x-19.82<br>R <sup>2</sup> =0.6166               | y=-4710.2x+26.317<br>R <sup>2</sup> =0.3226 |
| <b>K (mg/g)</b>  | y=0.9317x+4.3265<br>R <sup>2</sup> =0.7351  | y=-2586.4x+16.292<br>R <sup>2</sup> =0.2862 | y=0.0655x+2.2945<br>R <sup>2</sup> =0.5553              | y=-1225.8x+8.7373<br>R <sup>2</sup> =0.0727 |
| <b>Mg (mg/g)</b> | y=0.2489x+0.7486<br>R <sup>2</sup> =0.9812  | y=-179.84x+3.0084<br>R <sup>2</sup> =0.0259 | y=0.0083x-0.0883<br>R <sup>2</sup> =0.4387              | y=-101.13x+0.6869<br>R <sup>2</sup> =0.0242 |
| <b>Ca (mg/g)</b> | y=0.8083x-1.8862<br>R <sup>2</sup> =0.8258  | y=-1737.4x+7.5662<br>R <sup>2</sup> =0.1927 | y=0.0127x-0.3513<br>R <sup>2</sup> =0.4782              | y=-185.16x+0.8578<br>R <sup>2</sup> =0.0379 |

**Table S6.** Correlation between the group of essential and toxic metals and antioxidant activity in the leaves and fruits extracts.

|                  | Fruits                 |                        | Leaves                 |                        |
|------------------|------------------------|------------------------|------------------------|------------------------|
|                  | DPPH (R <sup>2</sup> ) | FRAP (R <sup>2</sup> ) | DPPH (R <sup>2</sup> ) | FRAP (R <sup>2</sup> ) |
| essential metals | 0.5219                 | 0.0563                 | 0.8563                 | 0.1625                 |
| toxic metals     | 0.921                  | 0.9221                 | 0.1234                 | 0.8933                 |

## References

1. European Economic Community (EEC). Commission Directive 2008/100/EC. Amending Council Directive 90/496/EEC on nutrition labelling for food stuffs as regards recommended daily allowances, energy conversion factors and definitions. *Off. J. Eur. Commun.* **2008**, *L285*, 9–12. Available online: <https://eur-lex.europa.eu/legal-content/EN/TXT/?uri=CELEX:32008L0100> (accessed on 25/may/2018).
2. European Food Safety Authority (EFSA). Dietary exposure to inorganic arsenic in the European population. *EFSA J.* **2014**, *12*, 3597, doi:10.2903/j.efsa.2014.3597.
3. EFSA. Cadmium dietary exposure in the European population. *EFSA J.* **2012**, *10*, 2551, doi:10.2903/j.efsa.2012.2551.
4. EFSA. Scientific opinion on lead in food. EFSA Panel on Contaminants in the Food Chain (CONTAM). *EFSA J.* **2010**, *8*, 1570, doi:10.2903/j.efsa.2010.1570.
